# Supplementary material
Source: Springer Nature journal article supplement (https://www.springermedizin.de/resource/supplementary/12916_2010_298_MOESM4_ESM.pdf/9599588)

A)

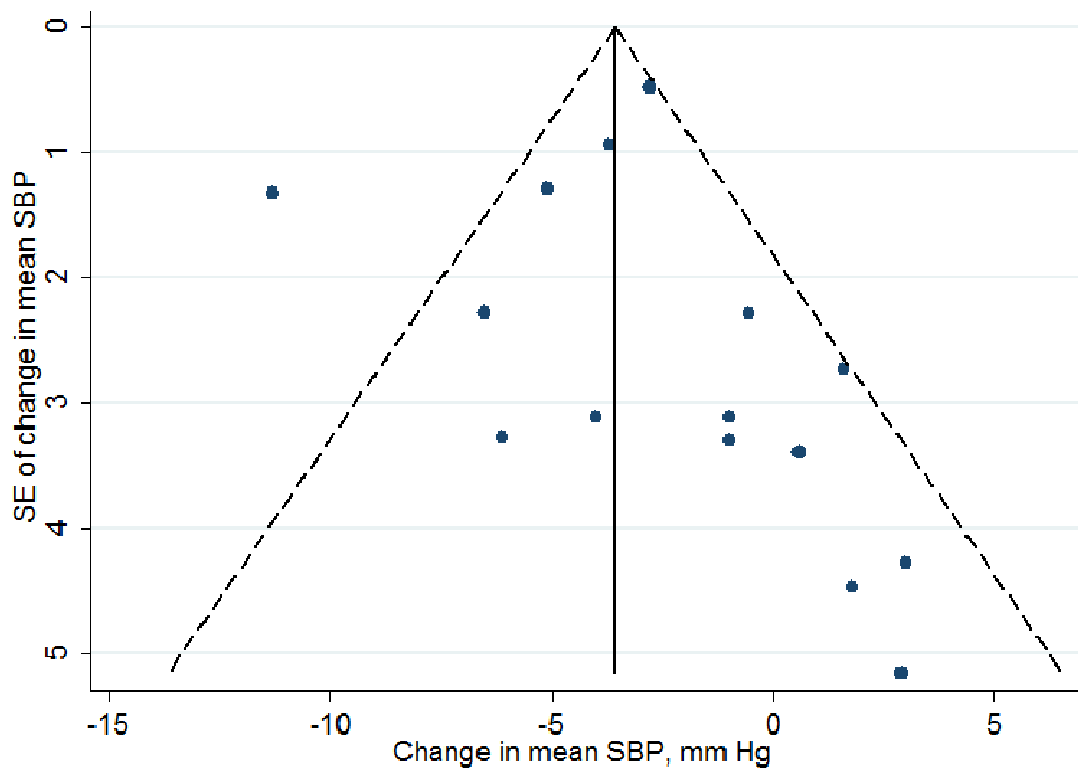

B)

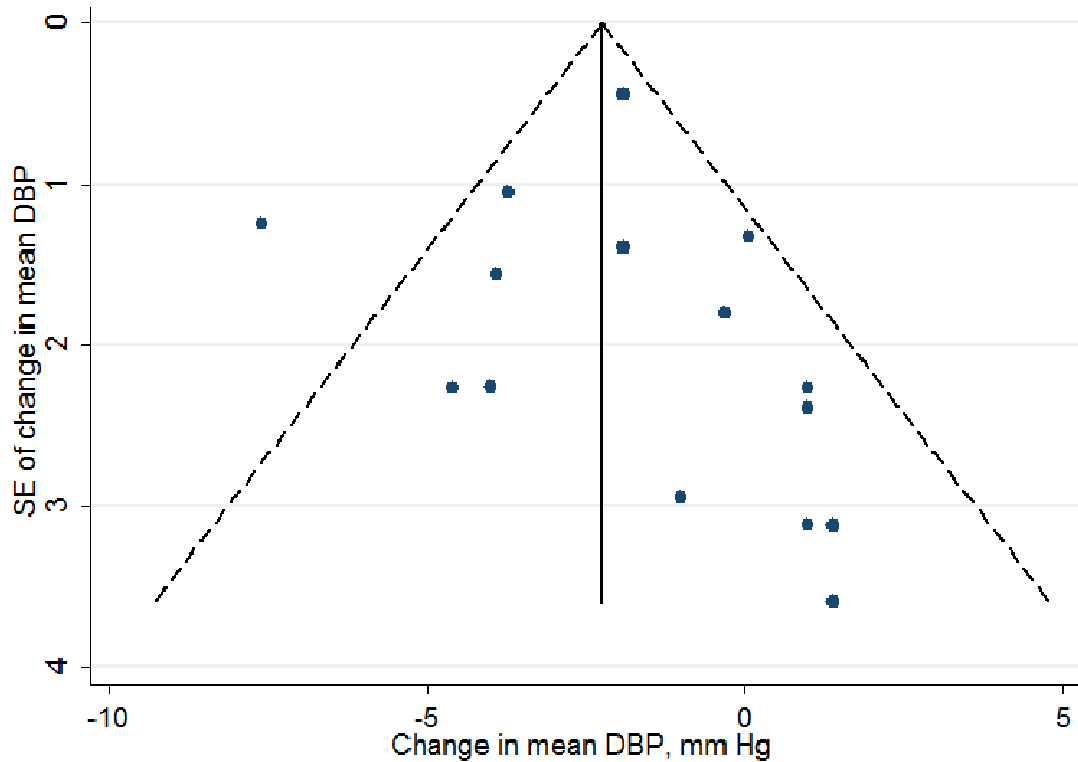

Supplement: MOESM4 [file 9599588]
